# Supplementary material
Source: ML conference proceedings conference paper supplement (https://proceedings.mlr.press/v80/lake18a.html)
Supplement: Supplementary file [file lake18a-supp.pdf]

# Generalization without Systematicity: Supplementary materials

## SCAN grammar and interpretation function

The phrase-structure grammar generating all SCAN commands is presented in Figure 1. The corresponding interpretation functions is in Figure 2.

## Standard Encoder-Decoder RNN

We describe the encoder-decoder framework, borrowing from the description in Bahdanau et al. (2015). The encoder receives a natural language command as a sequence of  $T$  words. The words are transformed into a sequence of vectors,  $\{w_1, \dots, w_T\}$ , which are learned embeddings with the same number of dimensions as the hidden layer. A recurrent neural network (RNN) processes each word

$$h_t = f_E(h_{t-1}, w_t),$$

where  $h_t$  is the encoder hidden state. The final hidden state  $h_T$  (which may include multiple layers for multi-layer RNNs) is passed to the RNN decoder as hidden state  $g_0$  (see seq2seq diagram in the main article). Then, the RNN decoder must generate a sequence of output actions  $a_1, \dots, a_R$ . To do so, it computes

$$g_t = f_D(g_{t-1}, a_{t-1}),$$

where  $g_t$  is the decoder hidden state and  $a_{t-1}$  is the (embedded) output action from the previous time step. Last, the hidden state  $g_t$  is mapped to a softmax to select the next action  $a_t$  from all possible actions.

## Attention Encoder-Decoder RNN

For the encoder-decoder with attention, the encoder is identical to the one described above. Unlike the standard decoder that can only see  $h_T$ , the attention decoder can access all of the encoder hidden states,  $h_1, \dots, h_T$  (in this case, only the last layer if multi-layer). At each step  $i$ , a context vector  $c_i$  is computed as a weighted sum of the encoder hidden states

$$c_i = \sum_{t=1}^T \alpha_{it} h_t.$$

The weights  $\alpha_{it}$  are computed using a softmax function

$$\alpha_{it} = \exp(e_{it}) / \sum_{j=1}^T \exp(e_{ij}),$$

where  $e_{it} = v_a^\top \tanh(W_a g_{i-1} + U_a h_t)$  is an alignment model that computes the similarity between the previous decoder hidden state  $g_{i-1}$  and an encoder hidden state  $h_t$  (for the other variables,  $v_a$ ,  $W_a$ , and  $U_a$  are learnable parameters) (Bahdanau et al., 2015). This context vector  $c_i$  is then passed as input to the decoder RNN at each step with the function

$$g_i = f_D(g_{i-1}, a_{i-1}, c_i),$$

which also starts with hidden state  $g_0 = h_T$ , as in the standard decoder. Last, the hidden state  $g_i$  is concatenated with  $c_i$  and mapped to a softmax to select new action  $a_i$ .

|                           |                                    |                            |
|---------------------------|------------------------------------|----------------------------|
| C $\rightarrow$ S and S   | V $\rightarrow$ D[1] opposite D[2] | D $\rightarrow$ turn left  |
| C $\rightarrow$ S after S | V $\rightarrow$ D[1] around D[2]   | D $\rightarrow$ turn right |
| C $\rightarrow$ S         | V $\rightarrow$ D                  | U $\rightarrow$ walk       |
| S $\rightarrow$ V twice   | V $\rightarrow$ U                  | U $\rightarrow$ look       |
| S $\rightarrow$ V thrice  | D $\rightarrow$ U left             | U $\rightarrow$ run        |
| S $\rightarrow$ V         | D $\rightarrow$ U right            | U $\rightarrow$ jump       |

Figure 1: Phrase-structure grammar generating SCAN commands. We use indexing notation to allow infixing: D[i] is to be read as the i-th element directly dominated by category D.

|                                                    |                                                                             |                                                  |                                                                                                   |
|----------------------------------------------------|-----------------------------------------------------------------------------|--------------------------------------------------|---------------------------------------------------------------------------------------------------|
| $\llbracket \text{walk} \rrbracket$                | = WALK                                                                      | $\llbracket u \text{ opposite right} \rrbracket$ | = $\llbracket \text{turn opposite right} \rrbracket \llbracket u \rrbracket$                      |
| $\llbracket \text{look} \rrbracket$                | = LOOK                                                                      | $\llbracket \text{turn around left} \rrbracket$  | = LTURN LTURN LTURN LTURN                                                                         |
| $\llbracket \text{run} \rrbracket$                 | = RUN                                                                       | $\llbracket \text{turn around right} \rrbracket$ | = RTURN RTURN RTURN RTURN                                                                         |
| $\llbracket \text{jump} \rrbracket$                | = JUMP                                                                      | $\llbracket u \text{ around left} \rrbracket$    | = LTURN $\llbracket u \rrbracket$ LTURN $\llbracket u \rrbracket$ LTURN $\llbracket u \rrbracket$ |
| $\llbracket \text{turn left} \rrbracket$           | = LTURN                                                                     |                                                  | LTURN $\llbracket u \rrbracket$                                                                   |
| $\llbracket \text{turn right} \rrbracket$          | = RTURN                                                                     | $\llbracket u \text{ around right} \rrbracket$   | = RTURN $\llbracket u \rrbracket$ RTURN $\llbracket u \rrbracket$ RTURN $\llbracket u \rrbracket$ |
| $\llbracket u \text{ left} \rrbracket$             | = LTURN $\llbracket u \rrbracket$                                           |                                                  | RTURN $\llbracket u \rrbracket$                                                                   |
| $\llbracket u \text{ right} \rrbracket$            | = RTURN $\llbracket u \rrbracket$                                           | $\llbracket x \text{ twice} \rrbracket$          | = $\llbracket x \rrbracket \llbracket x \rrbracket$                                               |
| $\llbracket \text{turn opposite left} \rrbracket$  | = LTURN LTURN                                                               | $\llbracket x \text{ thrice} \rrbracket$         | = $\llbracket x \rrbracket \llbracket x \rrbracket \llbracket x \rrbracket$                       |
| $\llbracket \text{turn opposite right} \rrbracket$ | = RTURN RTURN                                                               | $\llbracket x_1 \text{ and } x_2 \rrbracket$     | = $\llbracket x_1 \rrbracket \llbracket x_2 \rrbracket$                                           |
| $\llbracket u \text{ opposite left} \rrbracket$    | = $\llbracket \text{turn opposite left} \rrbracket \llbracket u \rrbracket$ | $\llbracket x_1 \text{ after } x_2 \rrbracket$   | = $\llbracket x_2 \rrbracket \llbracket x_1 \rrbracket$                                           |

Figure 2: Double brackets ( $\llbracket \cdot \rrbracket$ ) denote the interpretation function translating SCAN’s linguistic commands into sequences of actions (denoted by uppercase strings). Symbols  $x$  and  $u$  denote variables, the latter limited to words in the set {walk, look, run, jump}. The linear order of actions denotes their temporal sequence.

## References

Bahdanau, D., Cho, K., and Bengio, Y. (2015). Neural machine translation by jointly learning to align and translate. In *Proceedings of ICLR Conference Track*, San Diego, CA. Published online: <http://www.iclr.cc/doku.php?id=iclr2015:main>.
